# Supplementary material for: Freshwater plumes and brackish lakes: Integrated microfossil and O-C-Sr isotopic evidence from the late Miocene and early Pliocene Bouse Formation (California-Arizona) supports a lake overflow model for the integration of the lower Colorado River corridor
Source: Oxford University Press journal article supplement (doi:10.1130/ges01610.1), 2018-06-08
Supplement: ges01610_suppmat.zip [file ges01610_suppmat.zip]

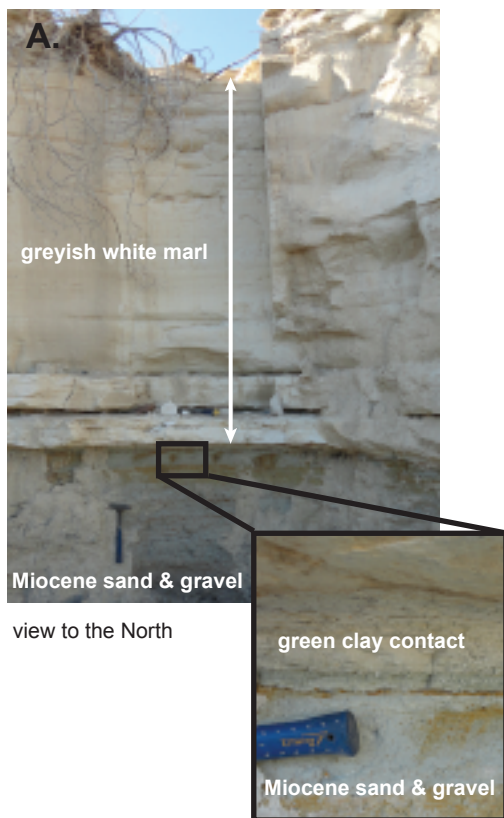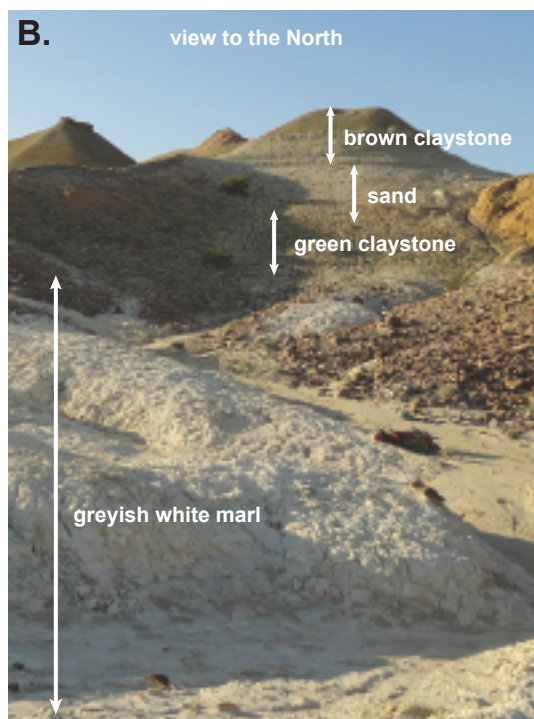

Supplemental Material Figure 1

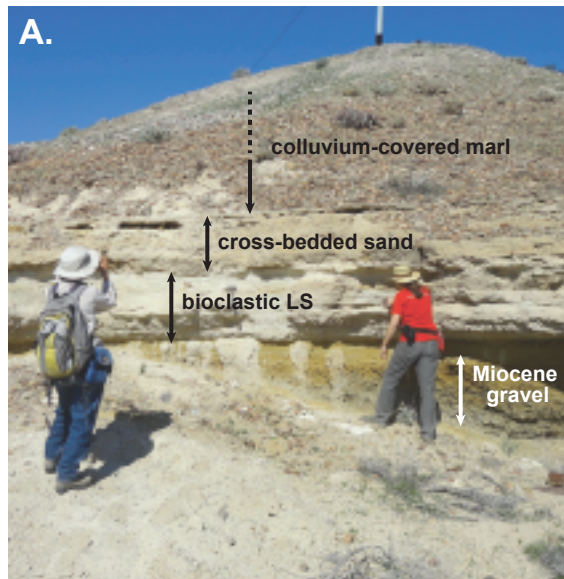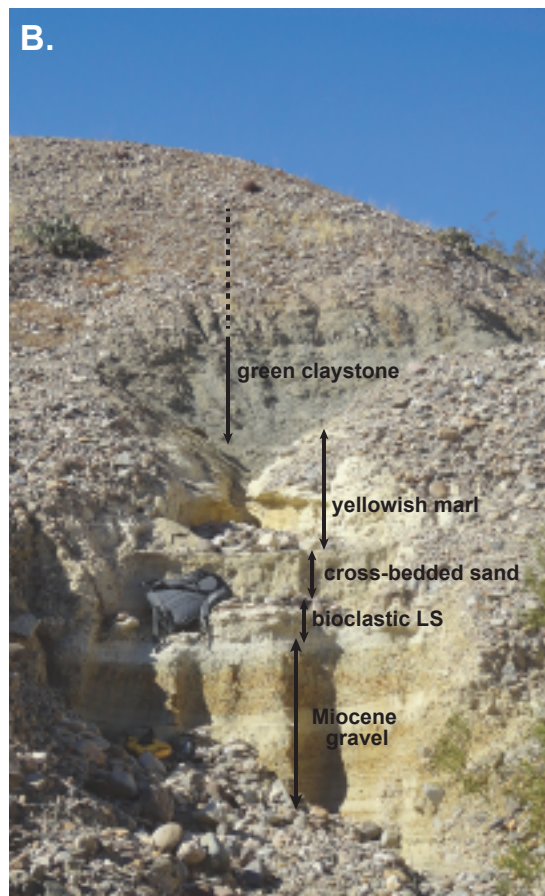

Supplemental Material Figure 2

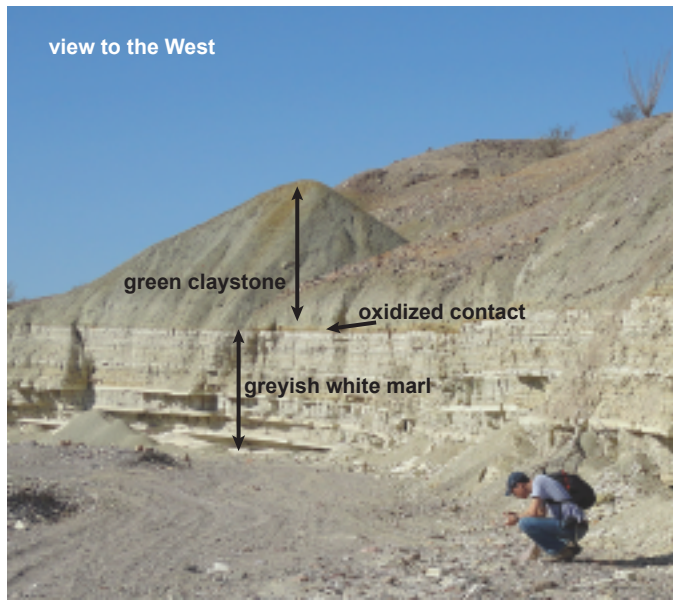

Supplemental Material Figure 3

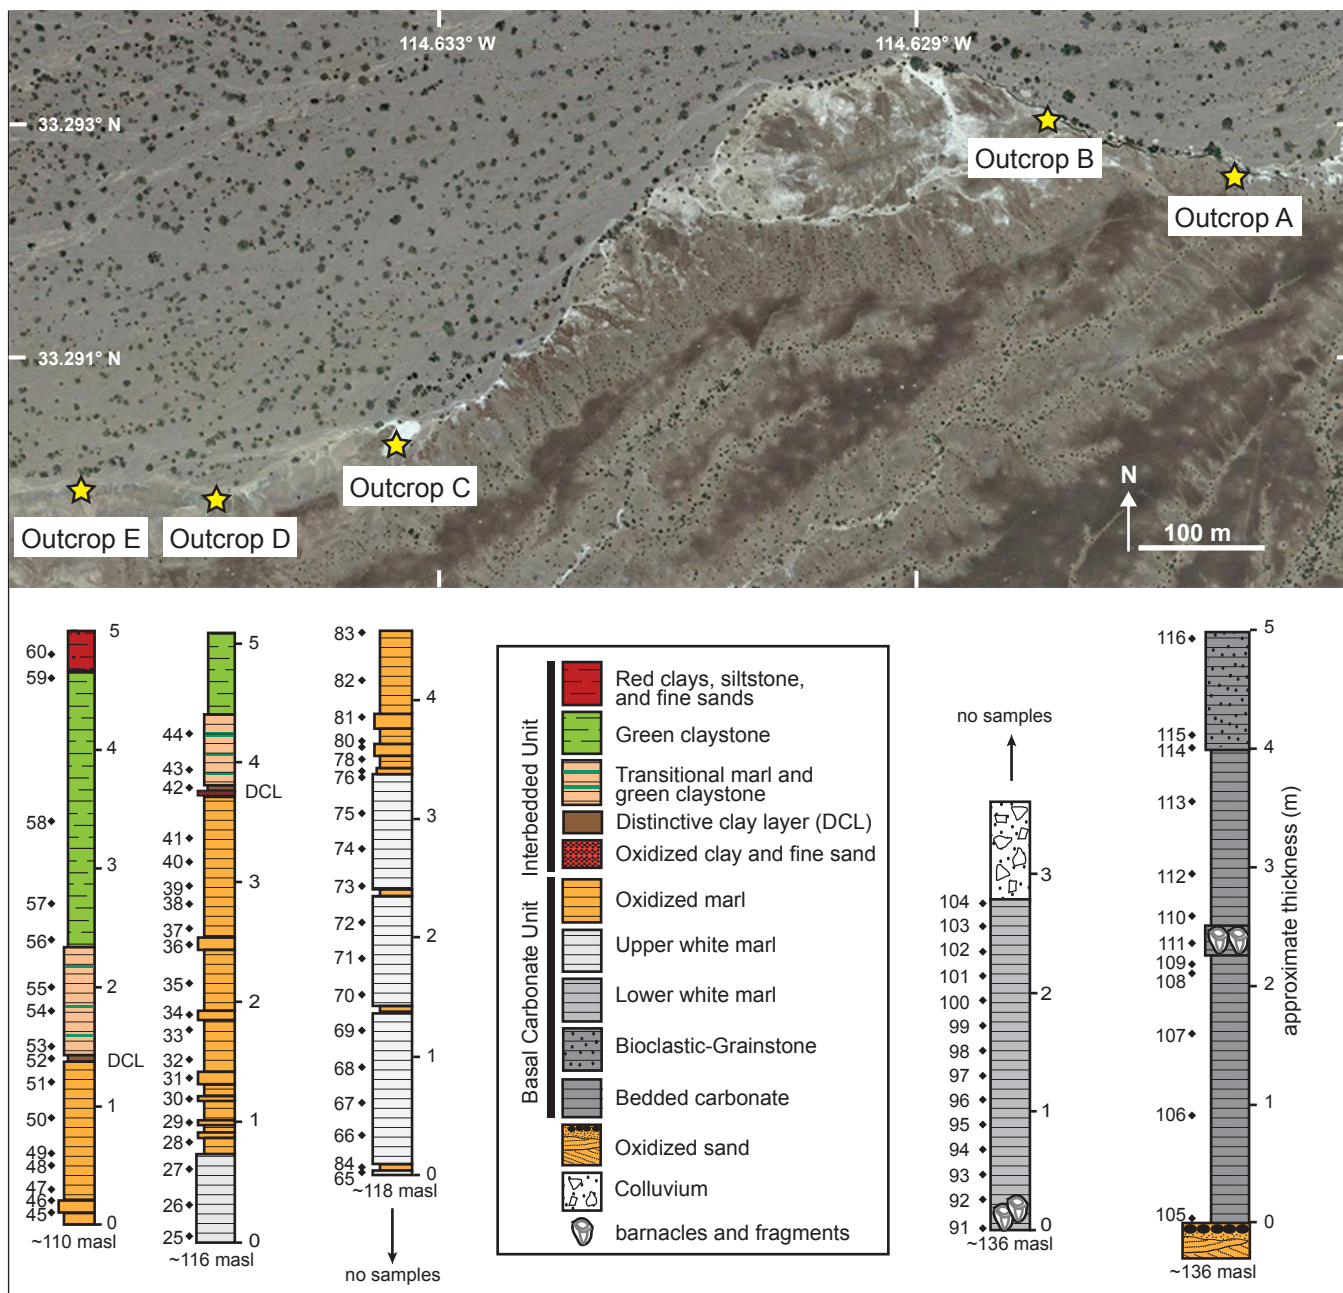

Supplemental Material Figure 4



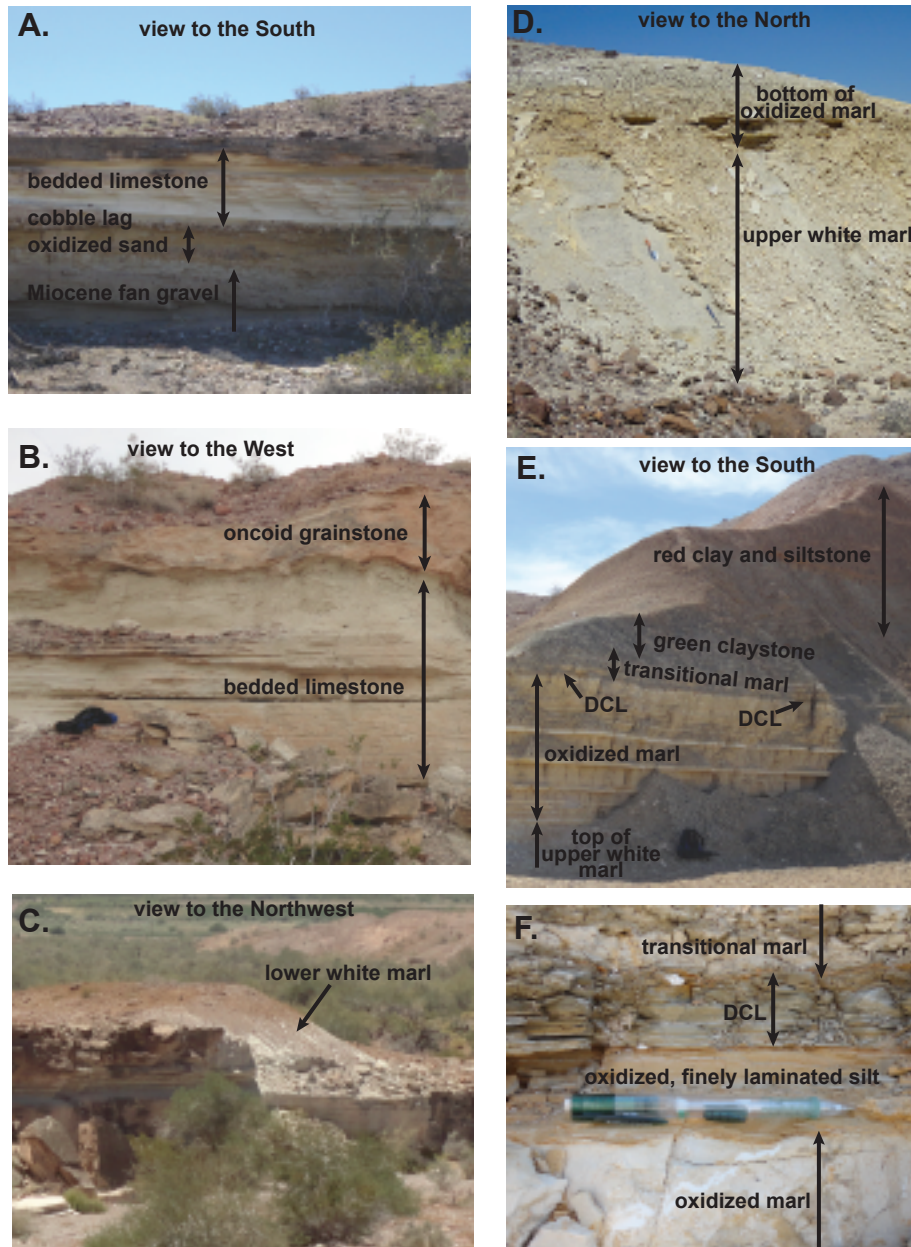

Supplemental Material Figure 5

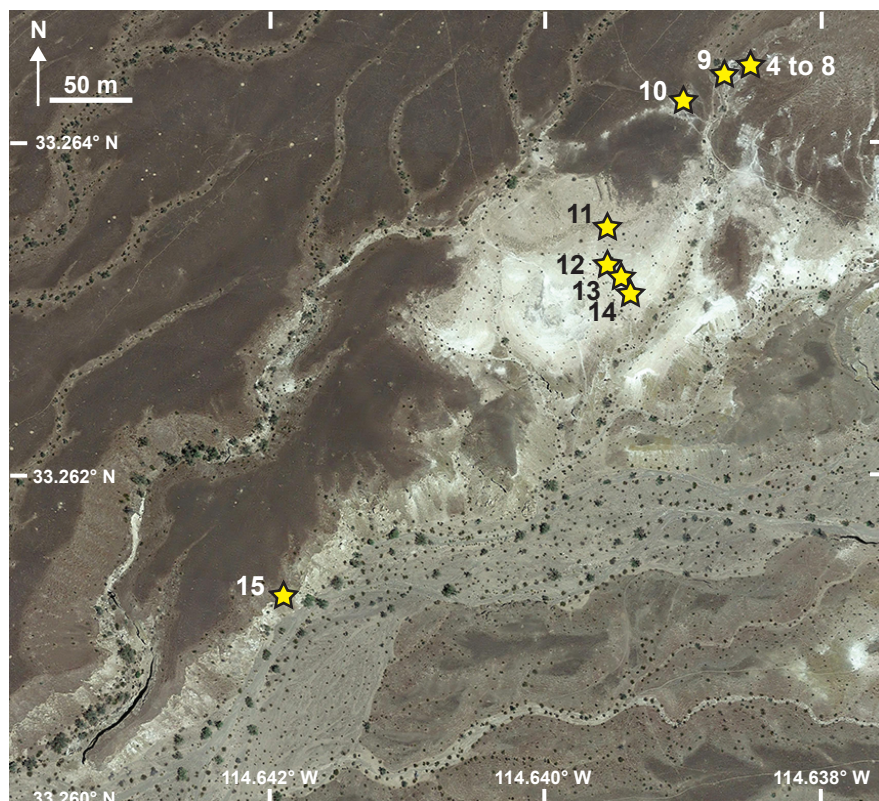

Supplemental Material Figure 6



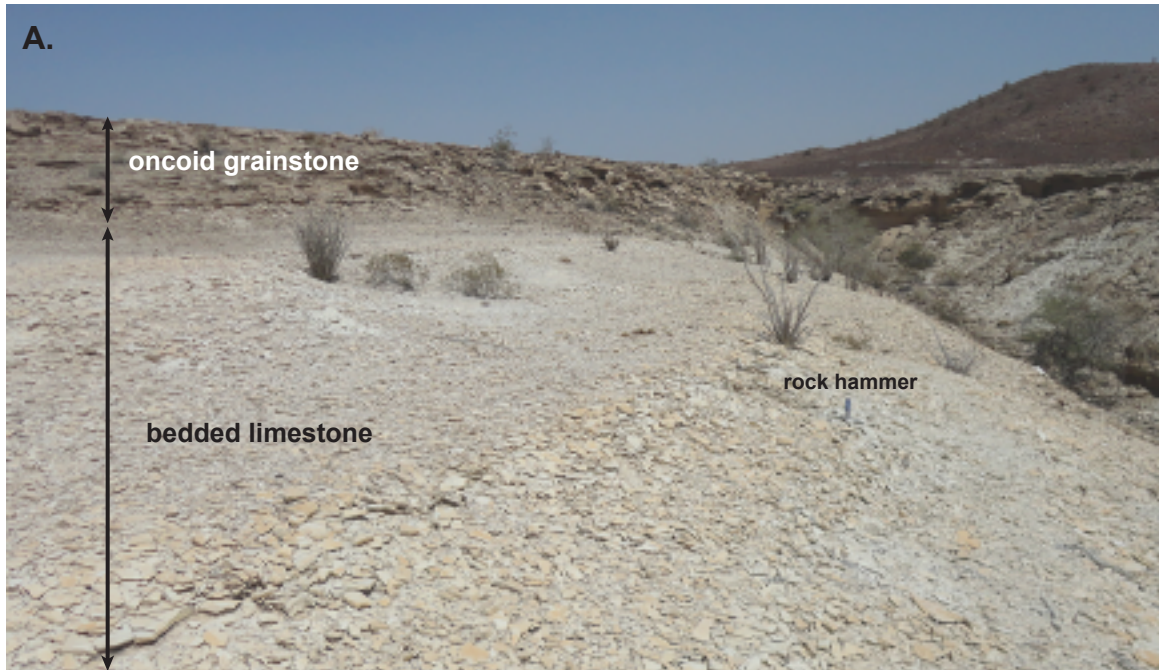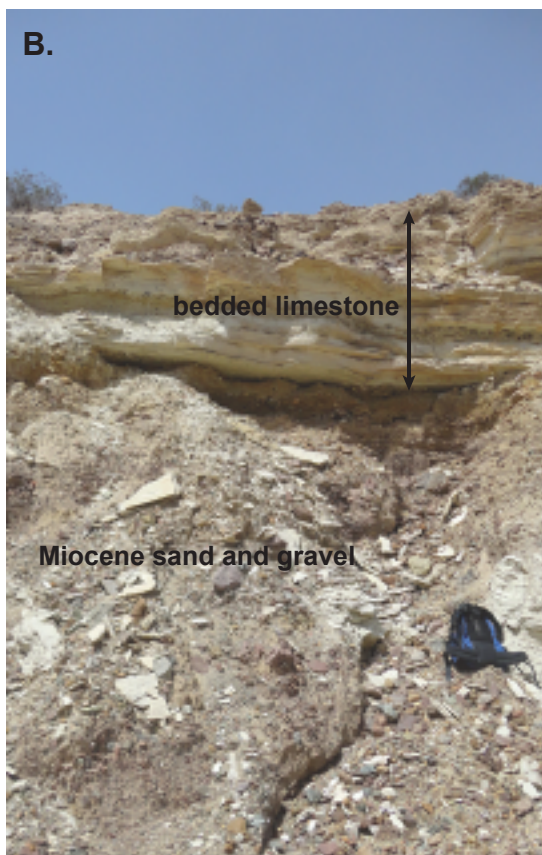

Supplemental Material Figure 7

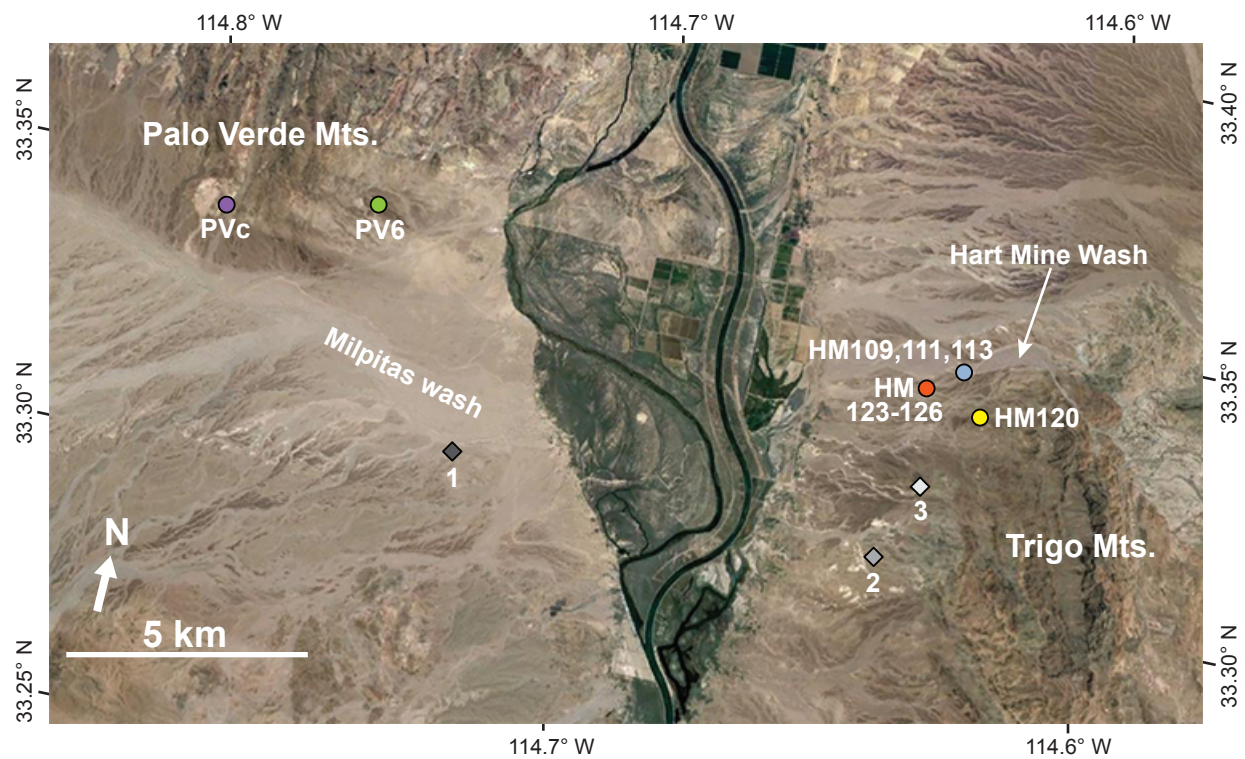

Supplemental Material Figure 8



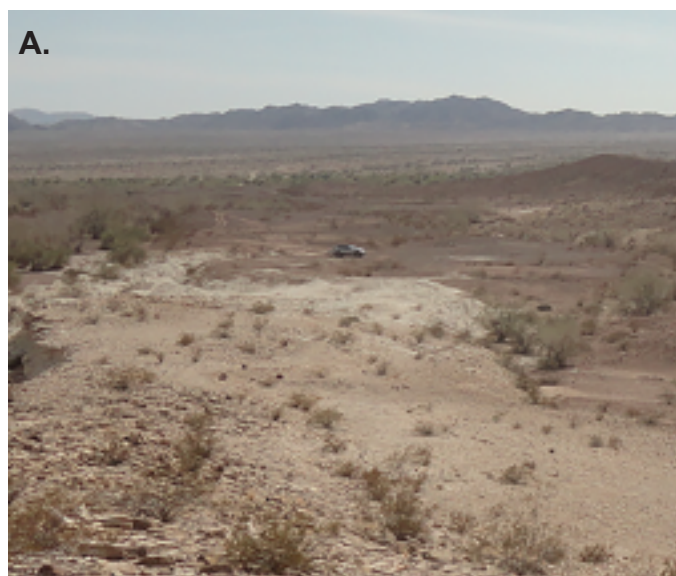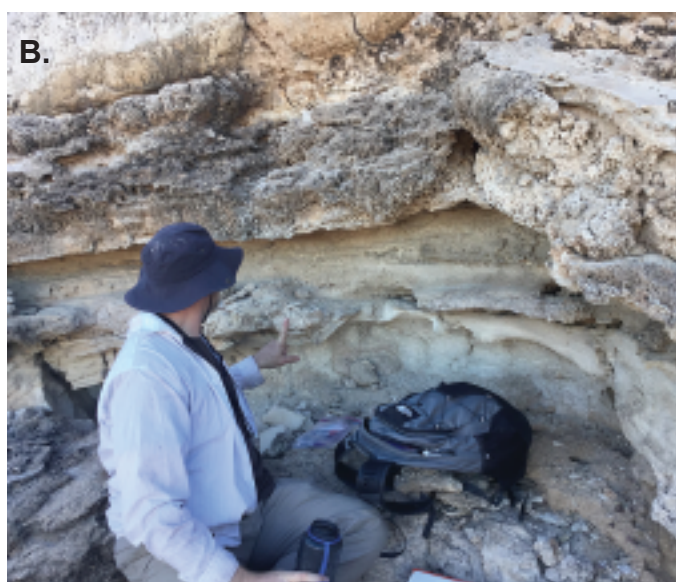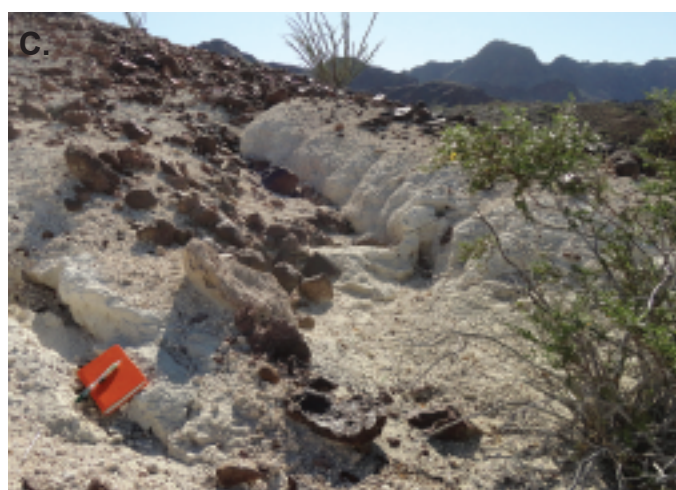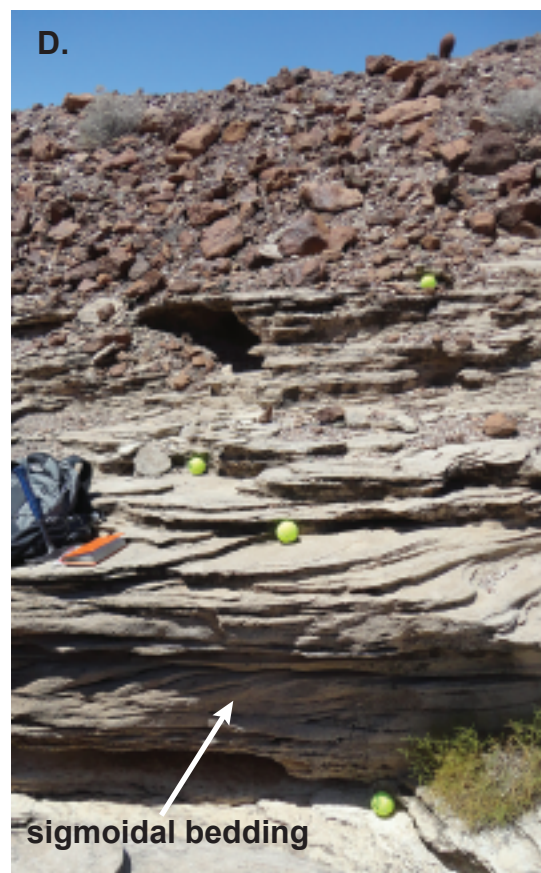

Supplemental Material Figure 9
